1 **Direct detection of mRNA expression in microbial cells by fluorescence *in situ***

2 **hybridization using RNase H-assisted rolling circle amplification**

3

4 Hirokazu Takahashi<sup>1, +, \*</sup>, Kyohei Horio<sup>2, +</sup>, Setsu Kato<sup>1,2</sup>, Toshiro Kobori<sup>3</sup>, Kenshi

5 Watanabe<sup>1,2</sup>, Tsunehiro Aki<sup>1,2</sup>, Yutaka Nakashimada<sup>1,2</sup> & Yoshiko Okamura<sup>1,2, \*</sup>

6

7 <sup>1</sup>*Graduate School of Integrated Sciences for Life, Hiroshima University,*

8 <sup>2</sup>*Graduate School of Advanced Sciences of Matter, Hiroshima University,*

9 *Higashihiroshima, Hiroshima, 739-8530, Japan*

10 <sup>3</sup>*Division of Food Biotechnology, Food Research Institute, National Agriculture and*

11 *Food Research Organization, Tsukuba, Ibaraki, 305-8642, Japan*

12

13 <sup>+</sup>These authors contributed equally to this work.

14

15 \*To whom correspondence should be addressed: Hirokazu Takahashi, Email:

16 ziphiro@hiroshima-u.ac.jp; Yoshiko Okamura, Email: okamura@hiroshima-u.ac.jp

17 **ABSTRACT**

18 Meta-analyses using next generation sequencing is a powerful strategy for studying  
19 microbiota; however, it cannot clarify the role of individual microbes within microbiota.  
20 To know which cell expresses what gene is important for elucidation of the individual  
21 cell's function in microbiota. In this report, we developed novel fluorescence *in situ*  
22 hybridization (FISH) procedure using RNase-H-assisted rolling circle amplification to  
23 visualize mRNA of interest in microbial cells without reverse transcription. Our results  
24 show that this method is applicable to both gram-negative and gram-positive microbes  
25 without any noise from DNA, and it is possible to visualize the target mRNA expression  
26 directly at the single-cell level. Therefore, our procedure, when combined with data of  
27 meta-analyses, can help to understand the role of individual microbes in the microbiota.

28

29

30 **Introduction**

31 Microbiota consists of several bacterial species, including non-cultivable microbes, via  
32 interactions such as nutrients and growth promoting substance. One of the goals of  
33 microbiology is to understand the impact of microbiota on the environment, animals  
34 including human to marine sponges, and plants including rhizosphere. Thus,  
35 meta-analyses such as metagenomics and metatranscriptomics using next generation  
36 sequencing (NGS) are powerful strategies for studying microbiota. In particular,  
37 high-throughput transcriptome sequencing (RNA-seq) data that contain amount and  
38 type of expressed mRNA are an important for understanding the behavior of the  
39 microbiota <sup>1</sup>.

40 Meanwhile, RNA-seq data cannot clarify the role of individual microbes because  
41 complete reference genome of individual microbes is often not available even when

42 metagenomic analysis is performed simultaneously. To clarify the role of individual  
43 microbes, single cell genome sequencing of individual microbes in the microbiota has  
44 been a trend in recent years <sup>2,3</sup>, however high cost restrict many researchers from  
45 performing these analysis.. Therefore, fluorescence *in situ* hybridization (FISH) of  
46 mRNA is an important method for understanding ‘who is doing what?’ in the  
47 microbiota with low cost.

48       However, compared with the oligo-FISH for 16S rRNA, which is commonly used  
49 in microbiology <sup>4</sup>, mRNA is difficult to visualize by FISH, because the mRNA of  
50 interest in a cell has an extremely low copy number compared to the rRNA. In fact,  
51 several high-sensitivity FISH methods for mRNA detection have been developed using  
52 enzymatic signal amplification such as catalyzed reporter deposition-FISH  
53 (CARD-FISH) <sup>5</sup> and its derivative methods (e.g. two pass tyramide signal amplification

54 FISH<sup>6</sup> and double CARD–FISH<sup>7</sup>). However, these methods cannot compare mRNA

55 expression level because the signal for these methods diffuses over the entire cell.

56 Although single-molecule FISH (smFISH) can detect a single mRNA molecule<sup>8</sup>

57 even in microbial cells<sup>9</sup>, this procedure is much expensive than the other FISH method

58 because it needs nearly 50 different detection probes carrying the same fluorophore

59 against one transcript of interest to increase detection sensitivity<sup>10</sup>. In addition,

60 RNA-seq data without a reference genome, especially from microbiota, are fragmented,

61 and the mRNA sequence of interest is often too short when designing nearly 50

62 detection probes.

63 A click-amplifying FISH method, termed ClampFISH, was recently developed to

64 amplify the fluorescence signal<sup>11</sup>. However, this method is time-consuming and

65 confounded by background noise presumably due to nonspecific hybridization of the

66 probe. Most currently available FISH methods, including RNAscope<sup>12</sup> and RollFISH<sup>13</sup>,  
67 rely on simple hybridization of oligonucleotide probes to mRNA sequences. Therefore,  
68 these methods cannot clearly distinguish between fluorescent signals originating from  
69 mRNA and genomic DNA, especially in microbes. The prokaryotic mRNA is an  
70 unspliced RNA; thus, the oligonucleotide probes cannot be set at the exon-exon junction  
71 to distinguish between genomic DNA and mRNA, which commonly used in  
72 reverse-transcription (RT)-PCR for detection of eukaryotic mRNA.

73 FISH using rolling circle amplification (RCA), which uses complementary DNA  
74 (cDNA) generated from mRNA by RT, has a potential to detect a single mRNA  
75 molecule in a eukaryotic cell<sup>14</sup>. This method makes it possible to distinguish between  
76 mRNA and genomic DNA with high probability, because it is difficult to initiate RCA  
77 reaction using the genomic DNA as a primer. The RCA product (RCP) contains a hyper

78 tandem-repeat of a DNA sequence complementary to a padlock probe (PLP). The RCP  
79 eventually becomes a platform on which a sufficient amount of the detection probe can  
80 hybridize. Therefore, single fluorescent probe for detection allows this method to be  
81 available at approximately 50-fold lower cost per gene as compared with the  
82 conventional smFISH. However, for the detection of microbial mRNA, the exonuclease  
83 treatment of cDNA to produce initiation point of RCA reaction will be difficult to  
84 optimize for each individual mRNA considering the operon structure, especially using  
85 the fragmented sequence data from RNA-seq. For these reasons, a cost-effective and  
86 user-friendly FISH method that detects only the target mRNA in a microbial cell is  
87 needed.

88       Recently, we developed RNase H-assisted RCA (RHa-RCA)<sup>15</sup>. The PLP used in  
89 this procedure can be set without full-length sequence information of target RNA;

90 therefore, PLP can be set even with a fragmented mRNA sequence such as RNA-seq  
91 data. In addition, this procedure can detect only RNA. Here we demonstrate a novel  
92 FISH method based on RHa-RCA for the visualization of mRNA expression level in  
93 microbial cells at a single-cell level.

#### 94 **Results and Discussion**

95 Figure 1 shows the scheme and workflow for our method of visualization of expressing  
96 mRNAs of interest in microbial cells. After cell fixation and permeabilization,  
97 RHa-RCA-FISH consists of five reaction steps (**Fig. 1A**): (i) PLP hybridization to a  
98 sequence of interest in the target mRNA molecule; (ii) circularization of hybridized PLP  
99 by SplintR ligase; (iii) producing nick site in the hybridized mRNA by RNase H; (iv)  
100 RCA using phi29 DNA polymerase to create RCP from the nick site; and (v) finally,  
101 detection probe hybridization to visualize RCP.



102           Using this method, it is possible to complete all steps except fluorescence  
103   microscopic observations in approximately 8 h (**Fig. 1B**). Typically, we perform up to  
104   step (iv) on the first day and then store the samples at 4°C, as RCPs are stable at this  
105   temperature. On the following day, step (v) and microscopy were performed.

106           At first, we have tested whether RHa-RCA-FISH detects mRNAs of green  
107   fluorescent protein (GFP) expressed in *Escherichia coli* cell. *E. coli* BL21(DE3)  
108   transformed with a plasmid carrying GFP gene (pET-AcGFP)<sup>16</sup> was cultured by  
109   inducing GFP expression through the addition of isopropyl-β-d-thiogalactopyranoside  
110   (IPTG), whereas the *E. coli* without the addition of IPTG were maintained as negative  
111   control (non-induced cell). The non-induced cells were cultured with 2% glucose to  
112   inhibit leaky expression of GFP mRNA. The GFP expression was confirmed by  
113   fluorescence microscopy using the harvested cells 2 h after the addition of IPTG

114 **(Supplementary Fig. 1)**. Considering that mRNA expression was observed before  
115 protein expression, the cells harvested 1 hour after addition of IPTG were used for  
116 RHa-RCA-FISH.

117 No fluorescent signal was observed in non-induced cells, even though the cells  
118 were also transformed by pET-AcGFP (**Fig. 2A**). In contrast, fluorescent signals were  
119 clearly observed in GFP-induced cells (**Fig. 2B**). This result clearly shows that  
120 RHa-RCA-FISH specifically detected GFP mRNA molecules and not the GFP DNA in  
121 the vector. In addition, the fluorescence signals formed spot-like shapes (**Fig. 2C**), as  
122 observed in microbial cells using smFISH<sup>9,10</sup>. Unfortunately, bacterial cells are too  
123 small to distinguish each RCP, so it was impossible to determine the exact number of  
124 spots in the constrained space of these cells. To count the exact number of spots in a

125 microbial cell, the use of super-resolution microscopy such as Stochastic Optical

126 Reconstruction Microscopy (STORM) is required <sup>17</sup>.

127 Because *E. coli* is a gram-negative bacteria, the utility of RHa-RCA-FISH in

128 microbiota will be limited if this method cannot be performed using the same protocol

129 for gram-positive bacteria, which have a thick peptide glycan coat. Therefore, next we

130 investigated whether RHa-RCA-FISH is applicable to *Brevibacillus choshinensis* as

131 control of gram-positive bacteria.

132 Using *B. choshinensis* harboring a plasmid carrying the DsRed gene under control

133 of the native P2 promoter, we observed fluorescence from the DsRed protein starting at

134 12 h after the start of the culture. The fluorescence of DsRed gradually increased,

135 reaching a maximum at 72 h (**Fig. 3, upper images**).

136           On the other hand, the fluorescent signal from DsRed mRNA by RHa-RCA-FISH  
137           was first observed 12 h after culture initiation, reaching a maximum at 24 h and then  
138           decreasing (**Fig. 3, middle images**). These results indicate that RHa-RCA-FISH can be  
139           performed following the same protocol even for gram-positive bacteria.

140           Interestingly, the signal in *B. choshinensis* varied greatly between individual cells  
141           (**Fig. 3, middle images**), while the fluorescent signals from GFP mRNA in *E. coli*  
142           showed minimal variation between cells (**Fig. 2B**). The reason the DsRed mRNA  
143           expression level varied between individual cells may be that mRNA expression from the  
144           P2 promoter occurs during cell wall synthesis<sup>18</sup>, which varies with the cell cycle stage.  
145           In addition, it was likely that the number of signals could be counted in cells with low  
146           mRNA abundance (**Fig. 3, lower images**). These results indicate that RHa-RCA-FISH  
147           have a potential to compare the amount of mRNA expression at the single-cell level.

148           Finally, we performed our protocol for simultaneous detection of both GFP and  
149           DsRed mRNA in suspension containing *E. coli* and *B. choshinensis* cells. As a result,  
150           red fluorescence (Alexa -568) and green fluorescence (Alexa -488) were observed from  
151           separate cells (**Fig. 4**). Although both the strains have similar cell shapes that cannot be  
152           discriminated under the microscopy we were able to distinguish between the two strains  
153           based on the species-specific fluorescence from labelled probes. This result indicates  
154           that RHa-RCA-FISH can simultaneously detect multiple specific mRNAs, even in  
155           microbiota containing both gram-positive and gram-negative bacteria.

156           Here we report that our method for *in situ* analysis of mRNA expression level in  
157           both gram-positive and gram-negative bacteria has potential to detect differences in  
158           amount of the mRNA between individual microbial cells without background noise  
159           from genomic or plasmid DNA. In this report, we performed RHa-RCA-FISH using

160 both gram-positive and gram-negative bacteria in liquid culture; thus, the samples used  
161 for RHa-RCA-FISH contain almost no impurities other than bacterial cells. In contrast,  
162 the samples that many researchers want to study, such as feces, soil, and symbiont,  
163 contain impurities other than bacterial cells. However, we believe that RHa-RCA-FISH  
164 can be performed for samples containing impurities because oligo-FISH for 16S rRNA has  
165 been performed on many samples including feces<sup>19</sup>, soil<sup>20</sup> and symbiont<sup>21</sup>. However, it  
166 is important to examine the method of fixing and permeabilization according to the state  
167 of the sample to be observed.

168 In this report, we have demonstrated that RHa-RCA-FISH will be able to  
169 compare the amount of mRNA expression in rod-shaped bacterial cells. However,  
170 whether the expression levels of mRNA can be compared greatly depends on the  
171 physical size and shape of the microbial cells. It is difficult to compare the expression

172 level in the cells of small cocci with a commonly used fluorescence microscope. The  
173 FISH signal and the cells were almost the same size, therefore, the mRNA expression  
174 level was not revealed in *Streptococcus thermophilus*, which used for fermentation of  
175 yogurt (data not shown). Thus, we believe that super-resolution microscopes such as  
176 STORM<sup>17</sup> will become essential in microbiology.

177 We used RNase H to digest RNA/DNA-hybrid but not DNA/DNA-hybrid  
178 molecules, therefore, our method can clearly distinguish between mRNA and DNA  
179 even prokaryotic mRNA remains unspliced. In addition, because the PLP used in this  
180 method can be set anywhere in the mRNA sequence<sup>15</sup>, the PLP can be set even in the  
181 RNA-seq data which may contain short sequence. Thus, we believe that our method for  
182 visualizing RNA molecules directly within cells could help understand the role of  
183 individual microbes in the microbiota when combined with the data of meta-analyses.

184

185 **Material and methods**

186 **Padlock probe and detection probe**

187 Each PLP position is shown in **Supplementary Figs. 3–4**. The PLP and detection probe

188 sequences are shown in **Supplementary Table 1**. All PLP and PCR primers were

189 purchased from Eurofins genomics (Ebersberg, Germany). Alexa labeled detection

190 probes were purchased from Japan Bio Services Co., LTD. ( Asaka, Saitama, Japan).

191 **Expression of GFP mRNA in *E. coli***

192 The *E. coli* strain BL21 (DE3) (Novagen, Merck Millipore, Darmstadt, Germany)

193 carrying pET-AcGFP was grown in LB medium (1% tryptone, 0.5% yeast extract, 1.0%

194 NaCl, and 50 µg/mL ampicillin) for 14–16 h at 30°C with shaking. The cultures were

195 diluted 1:1000 in fresh LB medium and incubated at 30°C with shaking. Growth was

196 monitored by the measurement of the optical density at 660 nm ( $OD_{660}$ ). When the



197 OD<sub>660</sub> was approximately 0.6, GFP expression was induced by the addition of IPTG  
198 (final concentration, 0.5 mM). The GFP-induced cells for RHa-RCA-FISH were  
199 harvested 1 h after IPTG addition. GFP-induced and non-induced cells were collected in  
200 1.5 mL tubes by centrifugation at 10,000 × g for 2 min at 4°C. Cells were immediately  
201 suspended in saturated ammonium sulfate (SAS) solution to inhibit RNase activity and  
202 store at 4°C before use. This treatment would keep the total RNA in the cells stable  
203 without degradation for at least 2 weeks (**Supplementary Fig. 2**).

#### 204 **Construction of expression vector for *B. choshinensis* and *in vitro* transcription**

205 The coding sequence of DsRed was isolated from the pDsRed-monomer vector  
206 (Clontech/TaKaRa Bio, Ohtsu, Shiga, Japan) by digestion with the appropriate  
207 restriction enzymes. The resulting fragment was cell-free cloned into pNI-His (Takara  
208 Bio) for expression in *B. choshinensis* cells as pNI-DsRed or pET-21d (Novagen) for *in*

209 *vitro* transcription as pET-DsRed. Detailed procedures for cell-free cloning are

210 described in the **Supplementary Material and Methods**.

### 211 **Expression of DsRed in *B. choshinensis***

212 The *B. choshinensis* strain HPD31-SP3 (Takara Bio) carrying pNI-DsRed was grown in

213 2SYF medium (20.0 g/L fructose, 40.0 g/L Phytone Peptone (Becton, Dickinson, and

214 Co., Franklin Lakes, NJ), 5.0 g/L Ehrlich bonito extract (Kyokuto Pharmaceutical

215 Co.LTD, Tokyo, Japan), and 0.15 g/L CaCl<sub>2</sub>·2H<sub>2</sub>O) containing 50 µg/mL neomycin for

216 12, 24, 48, or 72 h at 30°C with shaking. DsRed protein expression was confirmed by

217 fluorescence microscopy. The cells were harvested in 1.5 mL microcentrifuge tubes by

218 centrifugation at 10,000 × *g* for 2 min at 4°C. Cells were suspended in SAS and stored

219 at 4°C before use.

### 220 **Cell fixation and permeabilization**

221 The stored cells in SAS solution (600  $\mu$ L) were transferred to a 1.5 mL tube and  
222 centrifuged at 20,000  $\times g$  for 1 min at 4°C to remove the SAS solution. The cell pellet  
223 was resuspended in 300  $\mu$ L of 4% paraformaldehyde and incubated at room temperature  
224 for 15 min to fix the cells. After centrifugation, the cell pellet was resuspended with  
225 300  $\mu$ L of 70% ethanol and incubated at room temperature for 60 min to dehydrate the  
226 cells. After centrifugation under the same conditions to remove 70% EtOH, the cell  
227 pellet was resuspended with 262.5  $\mu$ L of 1 $\times$  TE buffer. Then, 37.5  $\mu$ L of lysozyme  
228 solution (200  $\mu$ g/mL in 50% glycerol) was added to the cell suspension solution and  
229 incubated at room temperature for 10 min to digest the cell wall. After centrifugation at  
230 same conditions to remove the lysozyme solution, the cells were washed twice with  
231 300  $\mu$ L of 1 $\times$  phosphate-buffered saline (PBS). After centrifugation, the cells were

232 resuspended with 14  $\mu$ L of  $\mu$ DW and transferred to 0.2 mL of PCR tube to prepare the

233 RCA reaction.

#### 234 **FISH using RHa-RCA**

235 The cells were mixed with 20 pmol of PLP in a buffer containing 20 mM Tris-acetate

236 (pH 7.5), 10 mM magnesium acetate (MgAc), and 50 mM potassium glutamate (KGlu)

237 in a final volume of 20  $\mu$ L. The PLP was hybridized by incubation at 95°C for 1 min,

238 slowly cooling to 30°C over 30 min, and incubation for 10 min at 30°C. To the cells

239 was added 10  $\mu$ L of ligation mixture (20 mM Tris-acetate [pH 7.5], 10 mM MgAc,

240 1.2 mM ATP, 50 mM KGlu, 10 mM dithiothreitol, and 25 units of SplintR ligase (New

241 England BioLabs, Ipswich, MA)), followed by incubation at 37°C for 10 min to seal the

242 PLP. In our previous report <sup>15</sup>, the ligase was inactivated by heating, but this step was

243 omitted in this study to shorten the reaction time and simplify the procedure. The

244 detection sensitivity was not affected (data not shown). The RHa-RCA reaction was  
245 started by mixing 30  $\mu$ L of the ligated mixture with 20  $\mu$ L of a reaction mixture  
246 containing 20 mM Tris-acetate (pH 7.5), 10 mM MgAc, 80 mM ammonium sulfate,  
247 10 mM KGlu, 2.0 mM deoxynucleoside triphosphate, 0.004 units of pyrophosphatase  
248 (New England BioLabs), 0.06 units of RNase H (BioAcademia, Osaka, Japan), and  
249 500 ng of DNA-free phi29 DNA polymerase (Kanto Chemical, Tokyo, Japan). The  
250 mixture was incubated at 30°C for 2 h followed by enzyme inactivation at 65°C for  
251 10 min.

252 The RCA reaction mixture containing the cells was transferred to a 1.5 mL tube.  
253 After centrifugation at 20,000  $\times g$  for 1 min at 4°C, the cells were washed with 1 $\times$  PBS  
254 at room temperature, suspended in 2 $\times$  saline sodium citrate, and transferred to a 1.5 mL  
255 black tube. After addition of the Alexa-labeled oligonucleotide, the cell suspension was

256 incubated at 37°C for 3 h to hybridize the oligonucleotide to RCP. After centrifugation  
257 at 20,000 × *g* for 1 min at 4°C, the cells were washed twice with 1× PBS at 37°C for  
258 15 min. The cells were suspended in 1× PBS and stored at 4°C in 1.5 mL black tubes  
259 before observation by microscopy.

260 RCA and hybridization were performed in bench-top cleanroom<sup>22</sup> to prevent  
261 contamination that could cause nonspecific hybridization..

## 262 **Imaging and analysis**

263 A drop of cell suspension hybridized with the detection probe was placed on 1%  
264 agarose pads containing 1× PBS . Images of each sample were taken on a fluorescence  
265 microscope (Nikon ECLIPSE E600 for *E. coli* and Nikon ECLIPSE Ti2-E for  
266 *B. choshinensis*, Tokyo, Japan ) equipped with a phase-contrast objective CFI PlanApo  
267 DM 100×(Nikon) and an ORCA-Flash4.0 V3 camera (Hamamatsu Co., Shizuoka,

268 Japan). Typically, the RHa-RCA-FISH, GFP, and DsRed fluorescence images were

269 taken using an exposure time of 100 msec. The images were analyzed using ImageJ

270 software (NIH).

271

272

## 273 REFERENCES

- 274 1 Jansson, J. K., Neufeld, J. D., Moran, M. A. & Gilbert, J. A. Omics for  
275 understanding microbial functional dynamics. *Environ Microbiol* **14**, 1-3 (2012).
- 276 2 Mason, O. U. *et al.* Metagenome, metatranscriptome and single-cell sequencing  
277 reveal microbial response to Deepwater Horizon oil spill. *ISME J* **6**, 1715-1727  
278 (2012).
- 279 3 Bowers, R. M. *et al.* Minimum information about a single amplified genome  
280 (MISAG) and a metagenome-assembled genome (MIMAG) of bacteria and  
281 archaea. *Nat Biotechnol* **35**, 725-731 (2017).
- 282 4 Amann, R. & Fuchs, B. M. Single-cell identification in microbial communities  
283 by improved fluorescence *in situ* hybridization techniques. *Nat Rev Microbiol* **6**,  
284 339-348 (2008).
- 285 5 Schonhuber, W., Fuchs, B., Juretschko, S. & Amann, R. Improved sensitivity of  
286 whole-cell hybridization by the combination of horseradish peroxidase-labeled  
287 oligonucleotides and tyramide signal amplification. *Appl Environ Microbiol* **63**,  
288 3268-3273 (1997).
- 289 6 Kubota, K. *et al.* Evaluation of enzymatic cell treatments for application of  
290 CARD-FISH to methanogens. *J Microbiol Methods* **72**, 54-59 (2008).
- 291 7 Neuenschwander, S. M., Salcher, M. M. & Pernthaler, J. Fluorescence *in situ*  
292 hybridization and sequential catalyzed reporter deposition (2C-FISH) for the  
293 flow cytometric sorting of freshwater ultramicrobacteria. *Front Microbiol* **6**, 247  
294 (2015).



- 295 8 Raj, A., van den Bogaard, P., Rifkin, S. A., van Oudenaarden, A. & Tyagi, S.  
296 Imaging individual mRNA molecules using multiple singly labeled probes. *Nat*  
297 *Methods* **5**, 877-879 (2008).
- 298 9 So, L. H. *et al.* General properties of transcriptional time series in *Escherichia*  
299 *coli*. *Nat Genet* **43**, 554-560 (2011).
- 300 10 Skinner, S. O., Sepulveda, L. A., Xu, H. & Golding, I. Measuring mRNA copy  
301 number in individual *Escherichia coli* cells using single-molecule fluorescent *in*  
302 *situ* hybridization. *Nat Protoc* **8**, 1100-1113 (2013).
- 303 11 Rouhanifard, S. H. *et al.* ClampFISH detects individual nucleic acid molecules  
304 using click chemistry-based amplification. *Nat Biotechnol* (2018).
- 305 12 Wang, F. *et al.* RNAscope: a novel *in situ* RNA analysis platform for  
306 formalin-fixed, paraffin-embedded tissues. *J Mol Diagn* **14**, 22-29 (2012).
- 307 13 Wu, C. *et al.* RollFISH achieves robust quantification of single-molecule RNA  
308 biomarkers in paraffin-embedded tumor tissue samples. *Communications*  
309 *Biology* **1**, 209 (2018).
- 310 14 Larsson, C. *et al.* *In situ* genotyping individual DNA molecules by target-primed  
311 rolling-circle amplification of padlock probes. *Nat. Methods* **1**, 227-232 (2004).
- 312 15 Takahashi, H. *et al.* RNase H-assisted RNA-primed rolling circle amplification  
313 for targeted RNA sequence detection. *Sci Rep* **8**, 7770 (2018).
- 314 16 Takahashi, H., Matsumoto, A., Sugiyama, S. & Kobori, T. Direct detection of  
315 green fluorescent protein messenger RNA expressed in *Escherichia coli* by  
316 rolling circle amplification. *Anal Biochem* **401**, 242-249 (2010).
- 317 17 Moffitt, J. R., Pandey, S., Boettiger, A. N., Wang, S. & Zhuang, X. Spatial  
318 organization shapes the turnover of a bacterial transcriptome. *Elife* **5** (2016).

- 319 18 Adachi, T., Yamagata, H., Tsukagoshi, N. & Udaka, S. Multiple and tandemly  
320 arranged promoters of the cell wall protein gene operon in *Bacillus brevis* 47. *J*  
321 *Bacteriol* **171**, 1010-1016 (1989).
- 322 19 Franks, A. H. *et al.* Variations of bacterial populations in human feces measured  
323 by fluorescent *in situ* hybridization with group-specific 16S rRNA-targeted  
324 oligonucleotide probes. *Appl Environ Microbiol* **64**, 3336-3345 (1998).
- 325 20 Christensen, H., Hansen, M. & Sorensen, J. Counting and size classification of  
326 active soil bacteria by fluorescence *in situ* hybridization with an rRNA  
327 oligonucleotide probe. *Appl Environ Microbiol* **65**, 1753-1761 (1999).
- 328 21 Pernthaler, A. & Amann, R. Simultaneous fluorescence *in situ* hybridization of  
329 mRNA and rRNA in environmental bacteria. *Appl Environ Microbiol* **70**,  
330 5426-5433 (2004).
- 331 22 Takahashi, H. *et al.* Development of a bench-top extra-cleanroom for DNA  
332 amplification. *Biotechniques* **61**, 42-46 (2016).

333

334

335 **Acknowledgments**

336 We thank the members of the Okamura lab for helpful discussions. This study was  
337 supported in part by the Step-Up Support Program for KAKENHI ( Grant-in-Aid for  
338 Scientific Research ) of Hiroshima University and Adaptable and Seamless Technology  
339 transfer program through target-driven R&D (A-STEP) of JST [No. AS2311331E].

340 **Contributions**

341 H. T, T. K, Y. N, and Y. O conceived of this study and designed the experiments. K. H  
342 performed nearly all of the experiments. K. H and S. K collected and analyzed the FISH  
343 images. T. K and Y. O obtained the necessary financial support. H. T, K. H, and Y. O  
344 prepared the initial draft of the manuscript. T. K, S. K, T. A, K. W, and Y. N revised the  
345 manuscript. All authors contributed to and have approved the final manuscript.

346 **Competing interests**

347 Hiroshima University has filed patent applications related to the technology described in  
348 this work to the Japan Patent Office. H. Takahashi, T. Aki, Y. Nakashimada, and Y.  
349 Okamura. are listed as inventors on the patents. No one received personal or  
350 institutional revenue associated with the patent applications. The JST as the funder had  
351 no role in the study design, data collection and analysis, decision to publish, or  
352 preparation of the manuscript. K. Horio, S. Kato, K. Watanabe, and T. Kobori declare  
353 no potential conflict of interests.  
354

355 **Figure legends**

356 **Figure 1.** Sheme and workflow for visualization of mRNA in microbial cells. by RNase

357 H-assisted RNA-primed rolling circle amplification (RHa-RCA–FISH). (A) Schematic

358 representation of RHa-RCA–FISH procedure. (B) Workflow of the procedure and

359 required time for *in situ* visualization of mRNA expression.

360

361 **Figure 2.** FISH detection of GFP mRNA in *E. coli* cells. (A) Detection of GFP mRNA

362 in non-induced *E. coli* cells carrying a GFP expression vector and (B) in GFP-induced

363 cells. Scale bar, 10  $\mu$ m. (C) Magnified image of box in (B). Scale bar, 5  $\mu$ m. An overlay

364 of the phase contrast (grayscale) and Alexa-568 labeled probes (red) targeting the RCP

365 from GFP mRNA is shown.

366

367 **Figure 3.** FISH detection of DsRed mRNA in *B. choshinensis* as a Gram-positive

368 bacterium.

369 Upper images show fluorescence of DsRed protein expressed in *B. choshinensis*; middle  
370 images show the signal of detection probes using FISH; lower images show the  
371 magnified image of the square box in middle images. The cells in the upper and middle  
372 images are not from the same sample because the protein is denatured by the FISH  
373 procedure. Overlays of the phase contrast (grayscale), DeRed protein (red), and  
374 Alexa-488 labeled probes (green) targeting the RCP from DsRed mRNA are shown.  
375 Scale bar, 10  $\mu$ m.

376

377 **Figure 4.** Simultaneous detection of GFP and DsRed mRNA in a mixture of *E. coli* and  
378 *B. choshinensis* cells.

379 An overlay of the phase contrast (grayscale) and Alexa-568 labeled probes (red)  
380 targeting the RCP from GFP mRNA and Alexa-488 labeled probes (green) targeting the  
381 RCP from DsRed mRNA are shown. Scale bar, 10  $\mu$ m.

**(A)**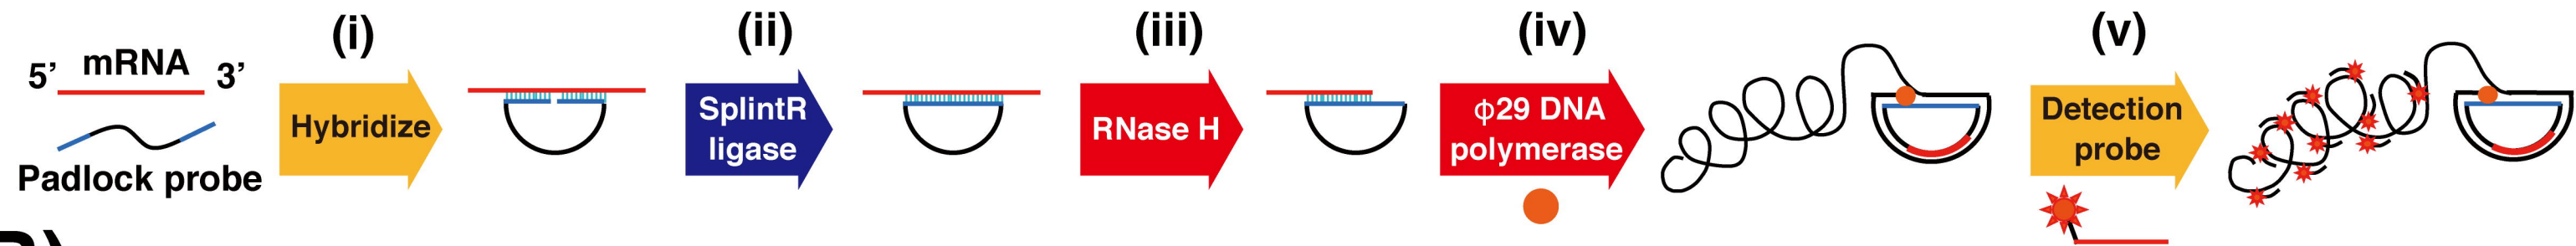**(B)**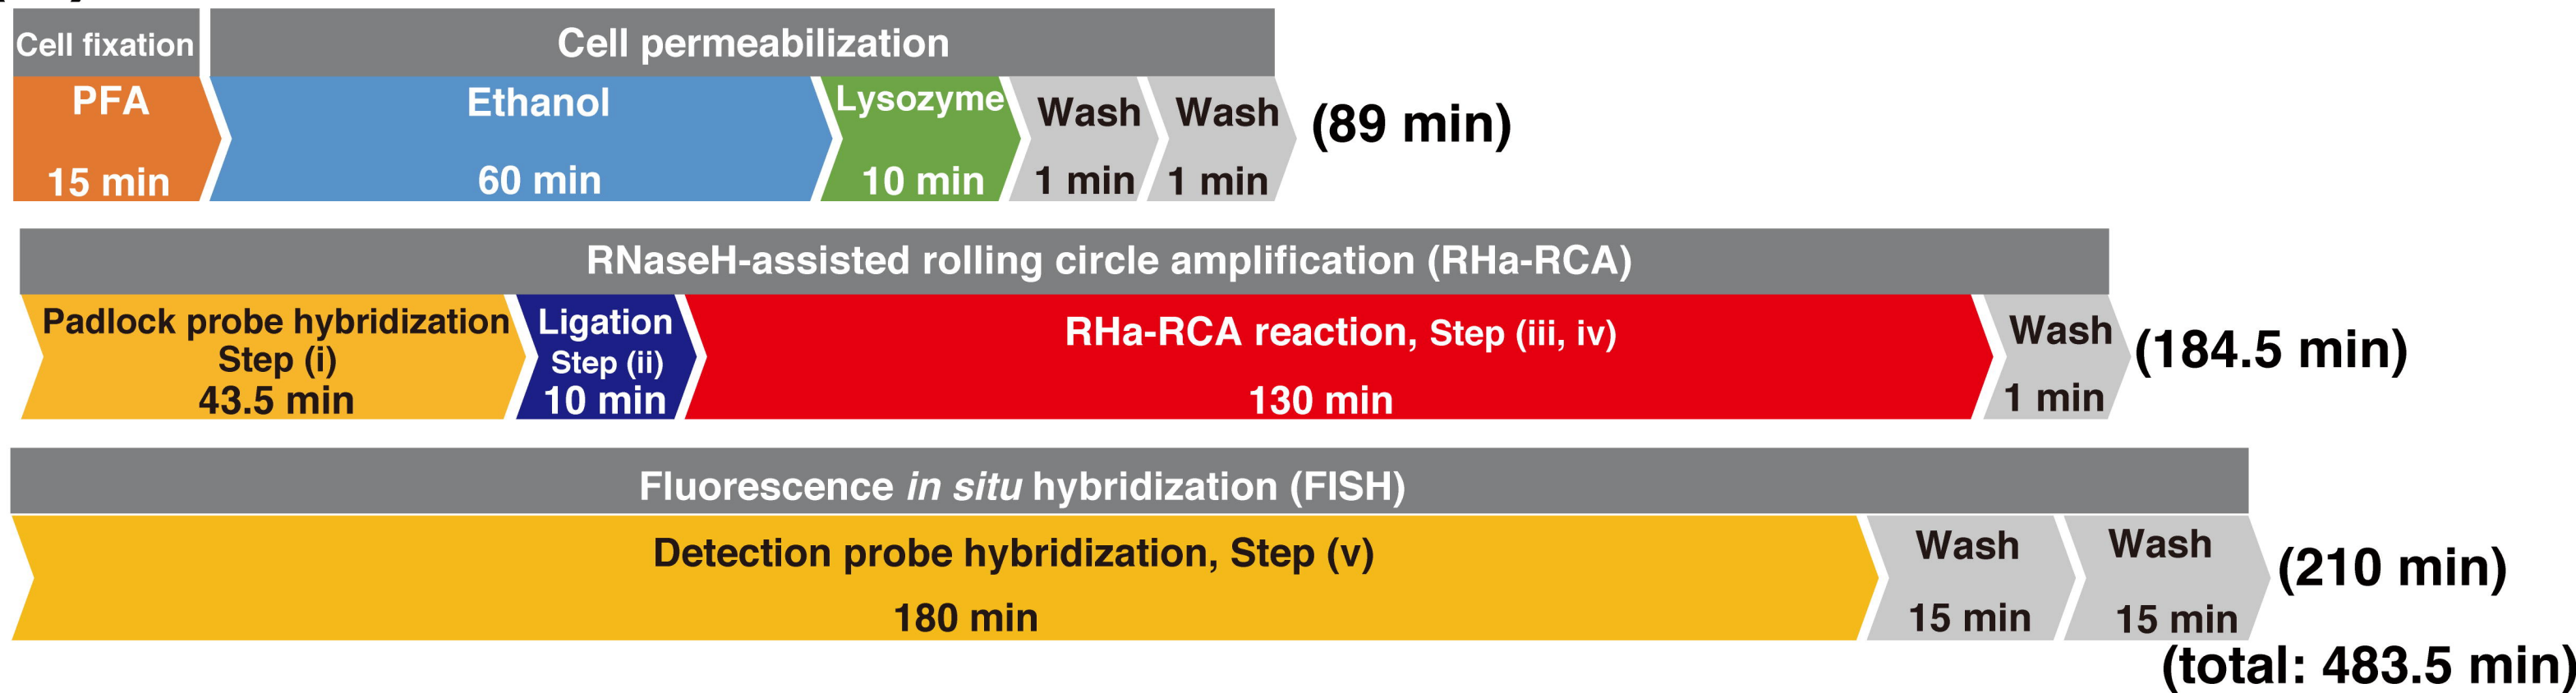



**(A)**

**non-induced cells**

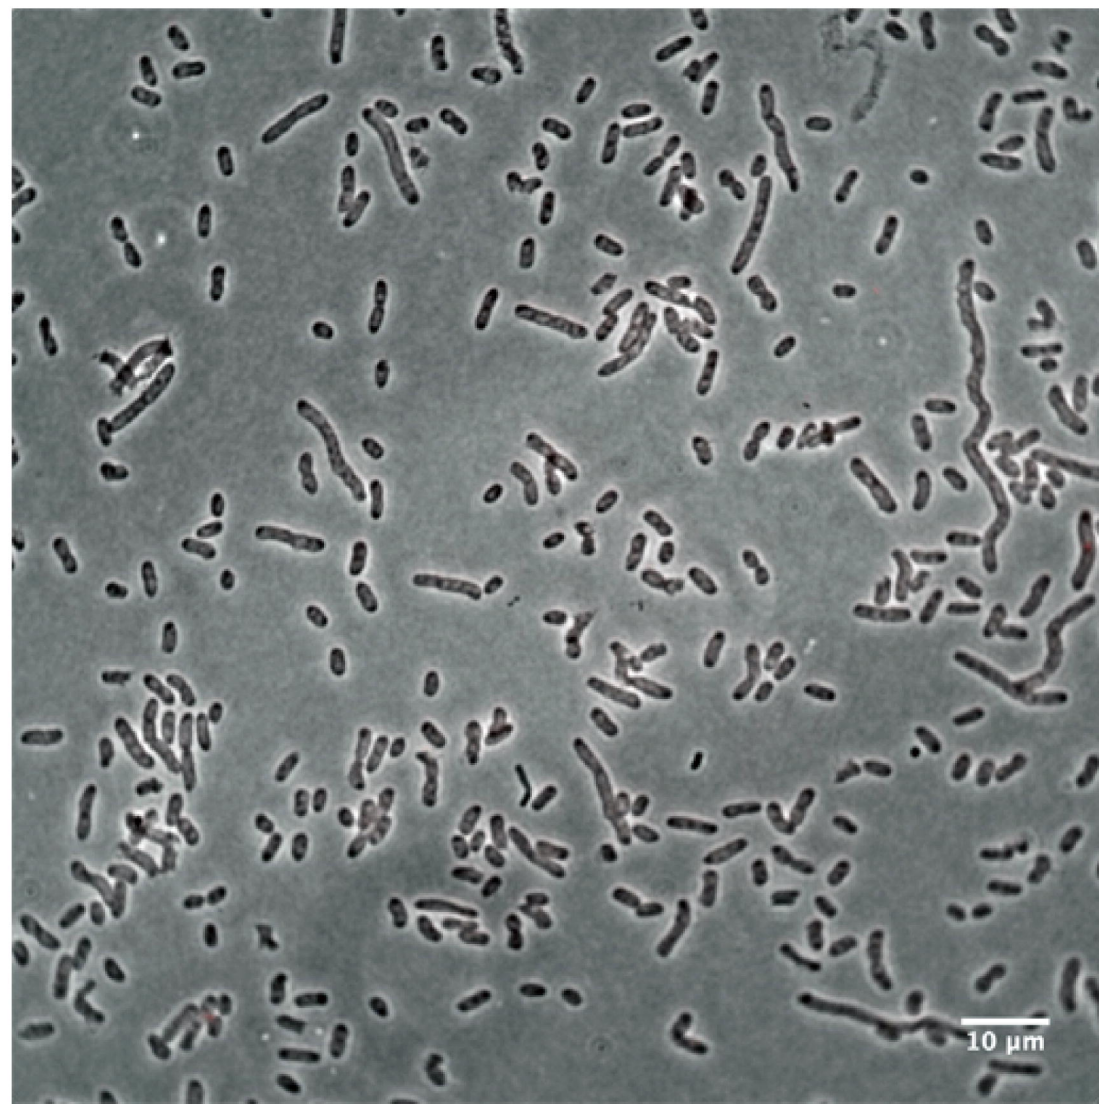

**(B)**

**GFP induced cells**

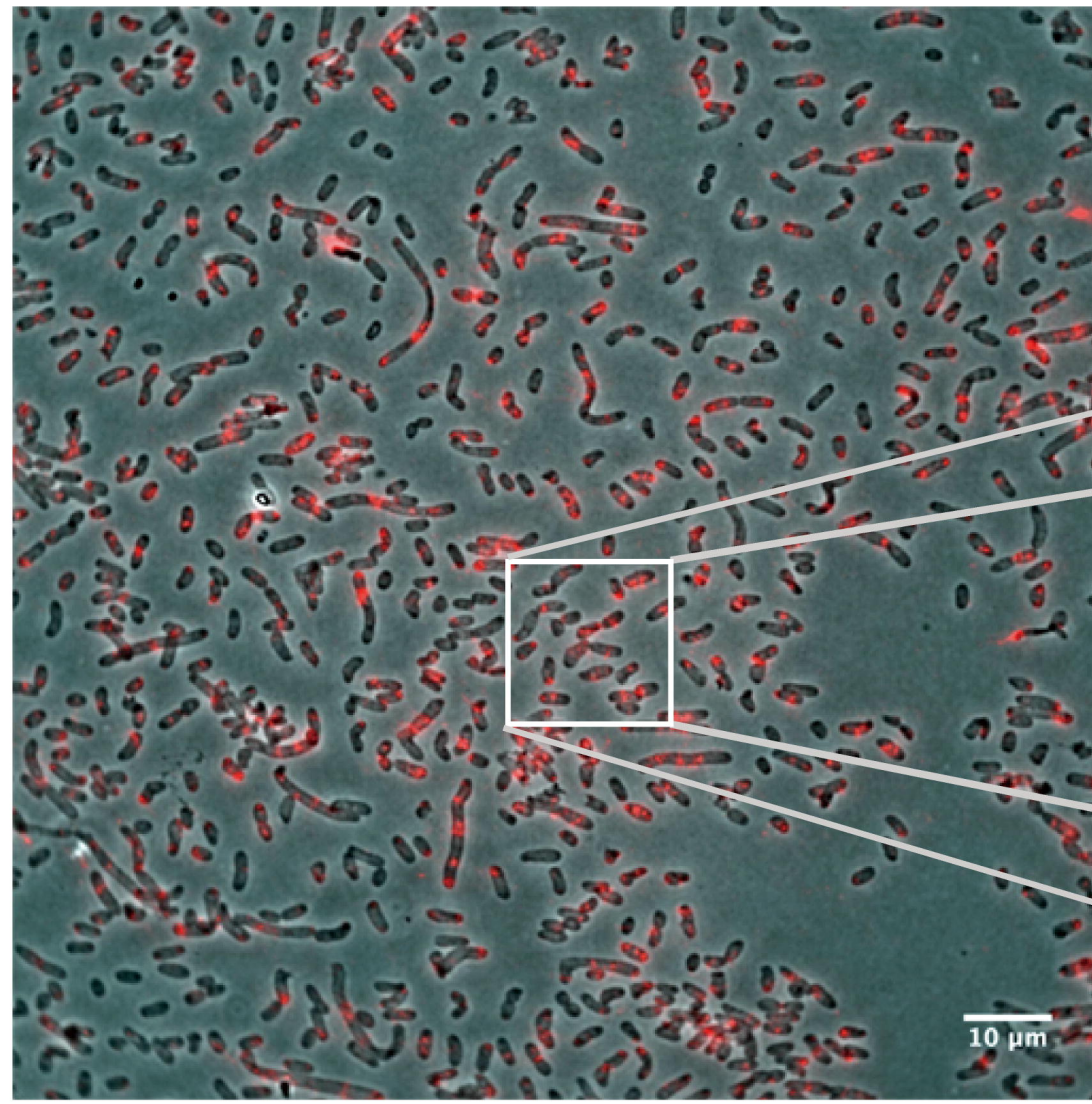

**(C)**

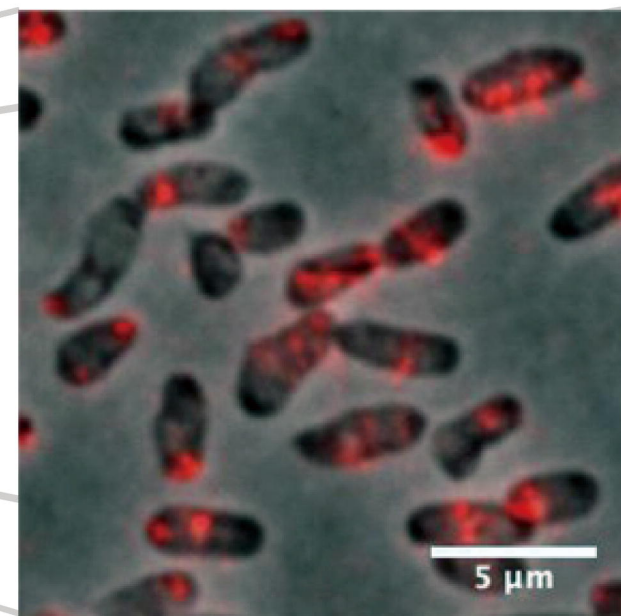



# Cultivation time (hours)

12

24

48

72

**DsRed**

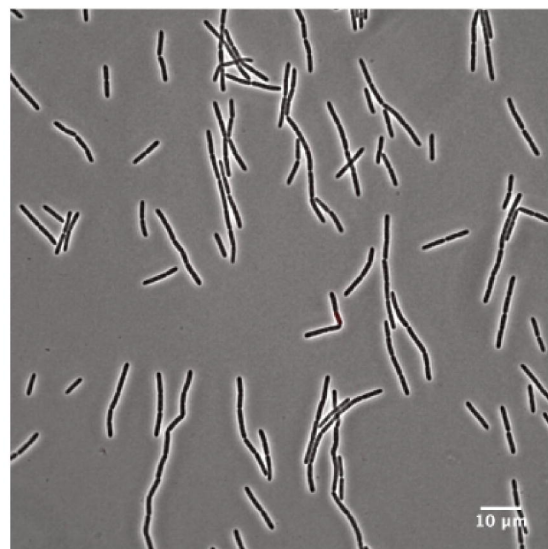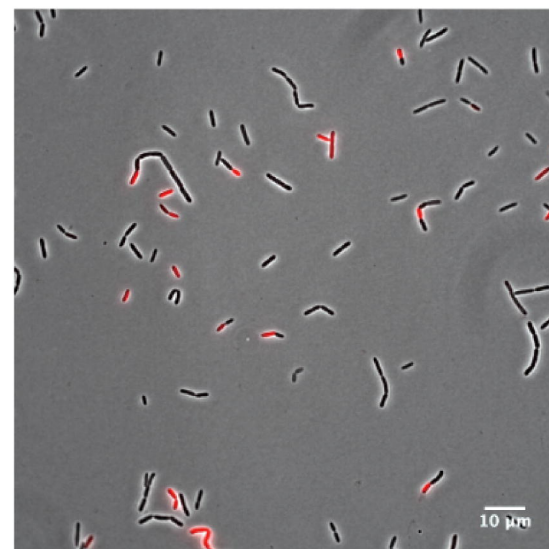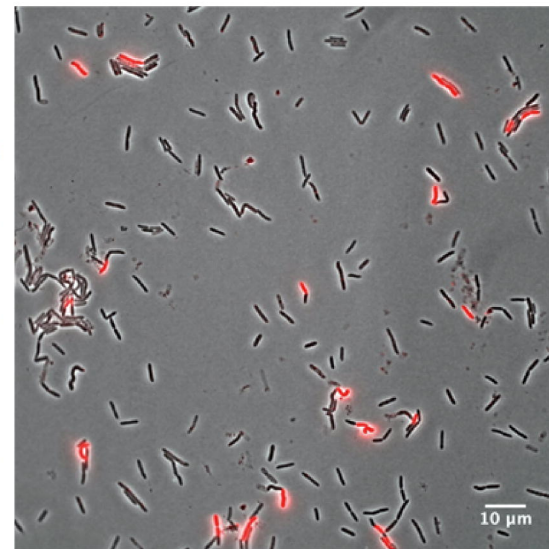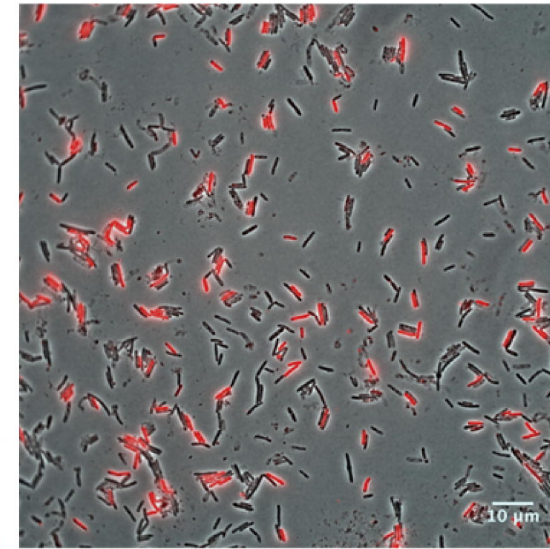

**Alexa-488  
(Wide angle)**

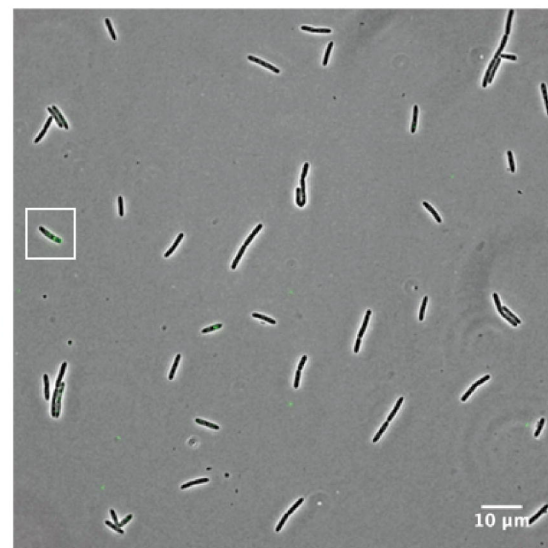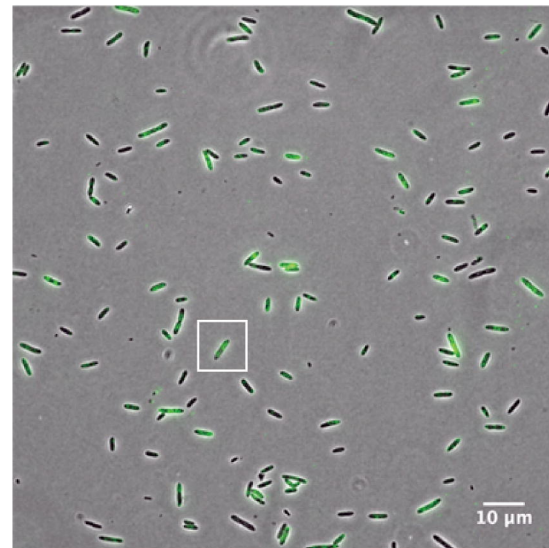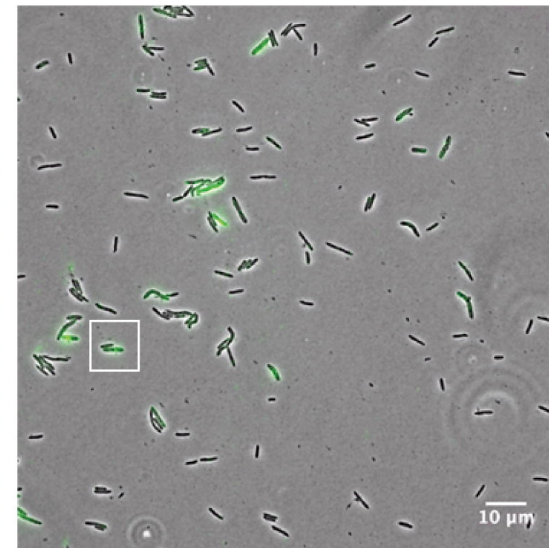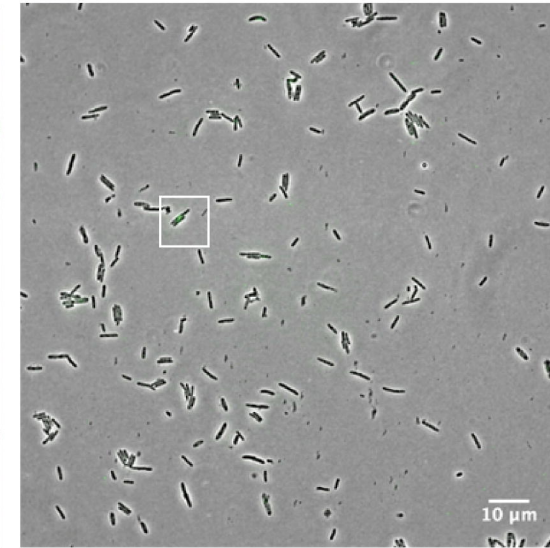

**Alexa-488  
(Magnified)**

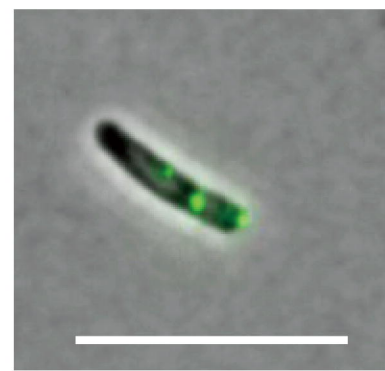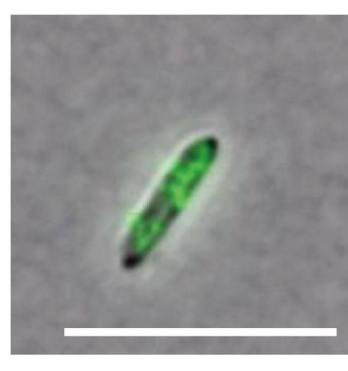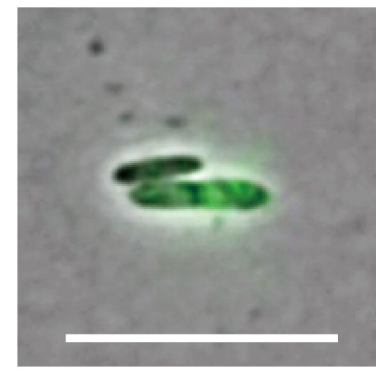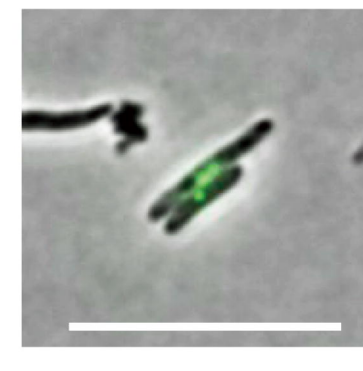

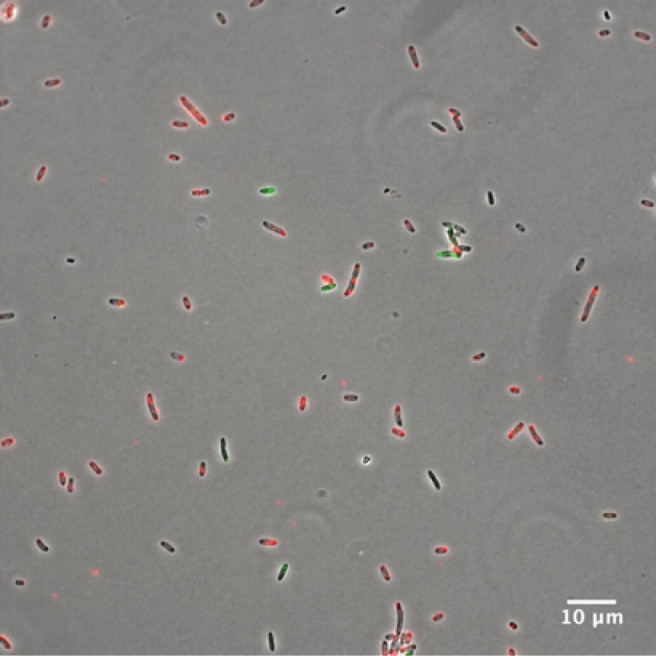

10 μm
